# Supplementary material for: Fabrication of a novel graphene oxide based magnetic nanocomposite and its usage as a highly effectual catalyst for the construction of N,N′-alkylidene bisamides
Source: Royal Society of Chemistry journal article supplement (doi:10.1039/d4ra04136d), 2024-01-01
Supplement: d4ra04136d1.pdf [file d4ra04136d1.pdf]

## Supplementary information

### **Fabrication of a novel graphene oxide based magnetic nanocomposite and its usage as a highly effectual catalyst for the construction of *N,N'*-alkylidene bisamides**

Abdolkarim Zare,<sup>\*a</sup> Marziyeh Barzegar,<sup>\*b</sup> Esmael Rostami<sup>b</sup> and Ahmad Reza Moosavi-Zare<sup>c,d</sup>

<sup>a</sup>*Department of Chemistry, Faculty of Nano and Bio Science and Technology, Persian Gulf University, Bushehr 75169, Iran. E-mail: a.zare@pgu.ac.ir, abdolkarimzare@yahoo.com*

<sup>b</sup>*Department of Chemistry, Payame Noor University, PO Box 19395-4697, Tehran, Iran. E-mail: barzegar.marziyeh@yahoo.com*

<sup>c</sup>*Department of Chemical Engineering, Hamedan University of Technology, Hamedan, 65155, Iran*

<sup>d</sup>*Chemistry Department, College of Sciences, Shiraz University, Shiraz 71946-84795, Iran*

| <b>Table of contents</b> .....                                          | <b>Page</b> |
|-------------------------------------------------------------------------|-------------|
| Materials and instruments .....                                         | S3          |
| Selected original spectrums of the constructed bisamides .....          | S4          |
| Figure S1. The $^1\text{H}$ NMR spectrum of bisamide <b>3</b> .....     | S4          |
| Figure S2. The $^{13}\text{C}$ NMR spectrum of bisamide <b>3</b> .....  | S5          |
| Figure S3. The $^1\text{H}$ NMR spectrum of bisamide <b>8</b> .....     | S6          |
| Figure S4. The $^{13}\text{C}$ NMR spectrum of bisamide <b>8</b> .....  | S7          |
| Figure S5. The mass spectrum of bisamide <b>8</b> .....                 | S8          |
| Figure S6. The $^1\text{H}$ NMR spectrum of bisamide <b>10</b> .....    | S9          |
| Figure S7. The $^{13}\text{C}$ NMR spectrum of bisamide <b>10</b> ..... | S10         |

## **Materials and instruments**

All reactants and solvents were purchased from Fluka or Sigma-Aldrich Chemical Companies. Progress of the reactions was monitored by TLC using silica gel SIL G/UV 254 plates. To measure the melting points, a Thermo Scientific 9200 apparatus was used. For recording the FT-IR spectra, a Thermo device (model AVATAR) was used. The NMR spectra were recorded on a Bruker Avance DPX FT-NMR spectrometer. EDX and elemental mapping analyses were done using a TESCAN device, model MIRA II. FE-SEM instrument TESCAN (model MIRA III) was utilized for determining sizes and morphologies of the particles. VSM analysis was performed using a MDK device (Meghnatis Daghigh Kavir, Iran) at room temperature. XRD analysis was carried out by a PHILIPS apparatus (Cu K $\alpha$  radiation,  $\lambda=1.54056$  Å, model PW1730). TGA was done using TA apparatus (model Q600), at 25-600 °C, with temperature increase rate of 10 °C.min<sup>-1</sup> in argon atmosphere.

## Selected original spectrums of the constructed bisamides

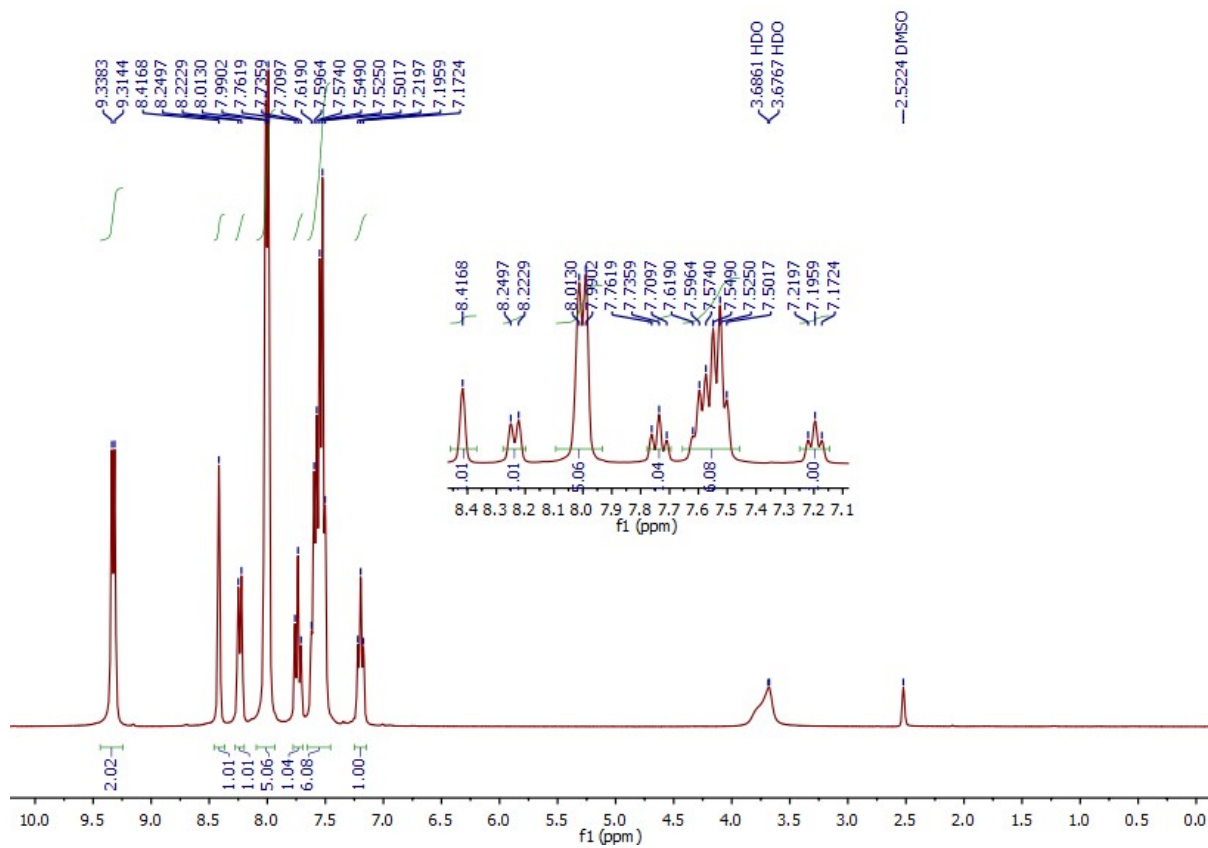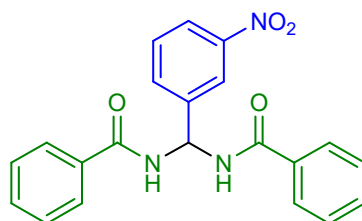

Figure S1. The <sup>1</sup>H NMR spectrum of bisamide 3.

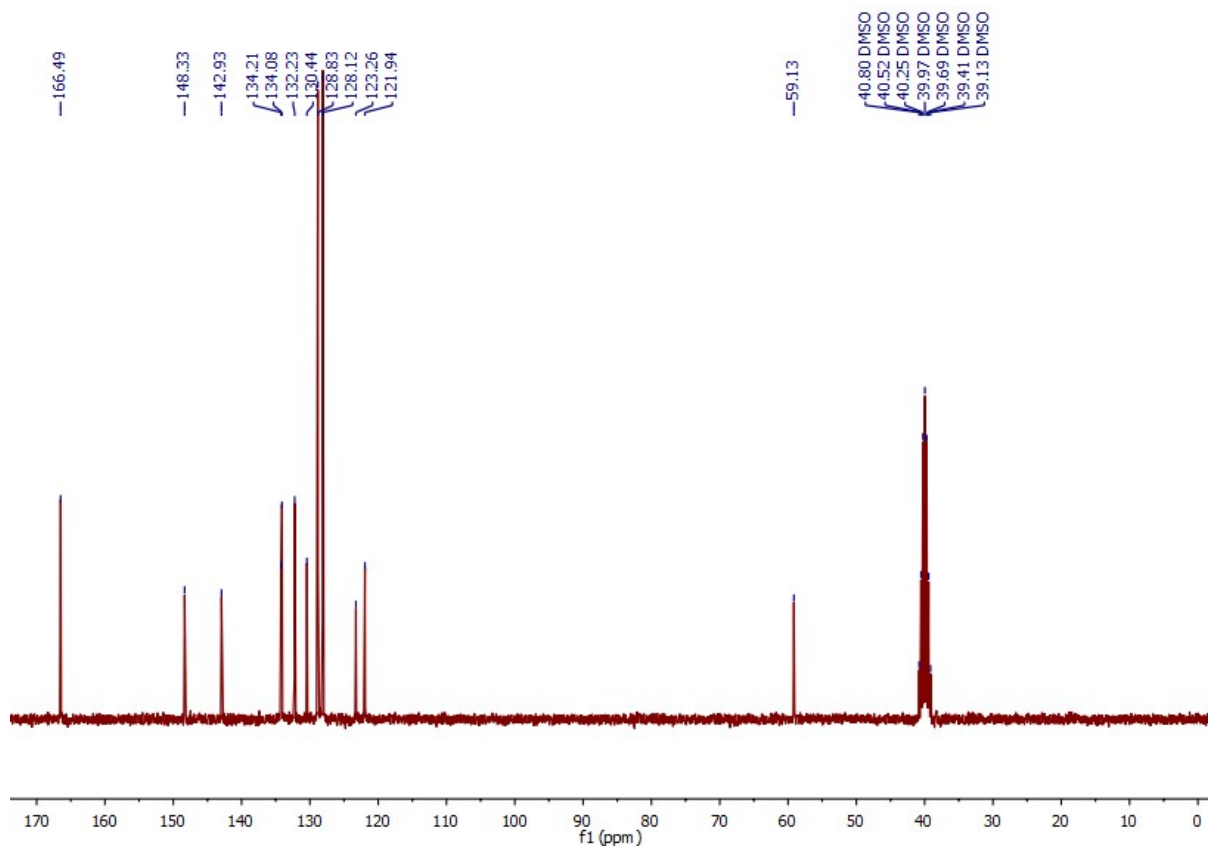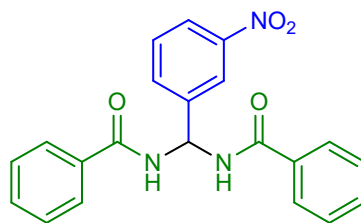

Figure S2. The  $^{13}\text{C}$  NMR spectrum of bisamide 3.

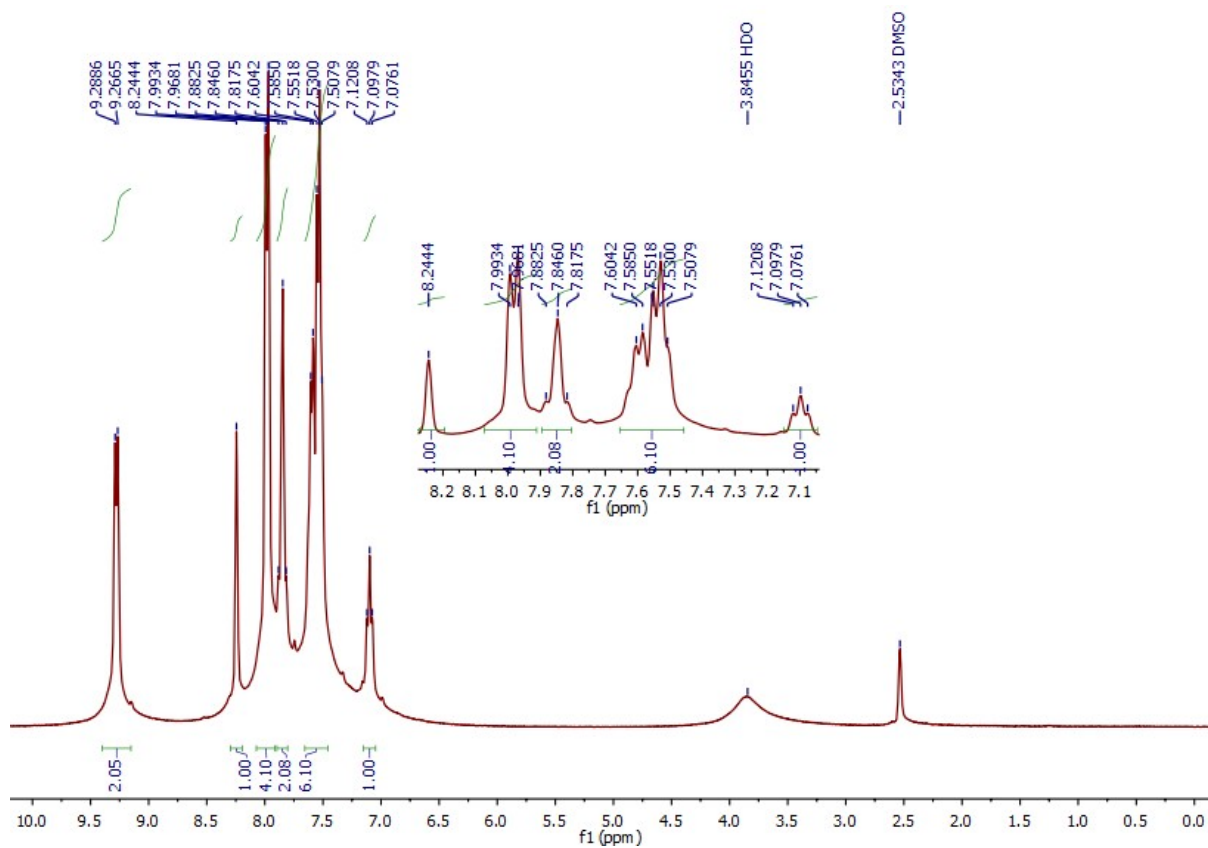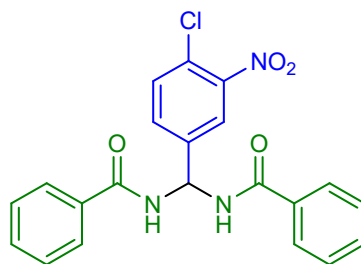

**Figure S3.** The <sup>1</sup>H NMR spectrum of bisamide **8**.

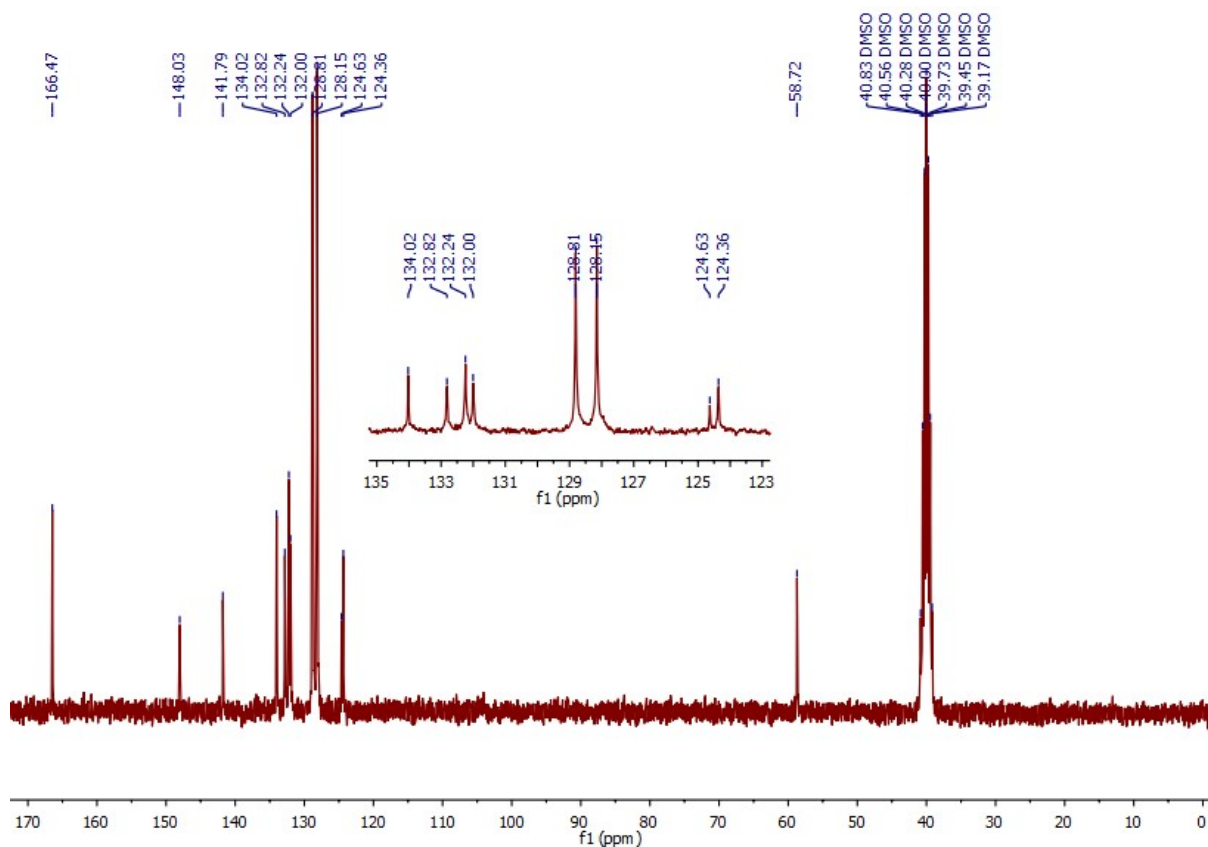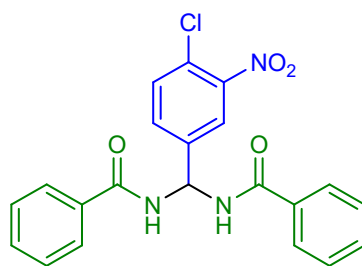

**Figure S4.** The  $^{13}\text{C}$  NMR spectrum of bisamide **8**.

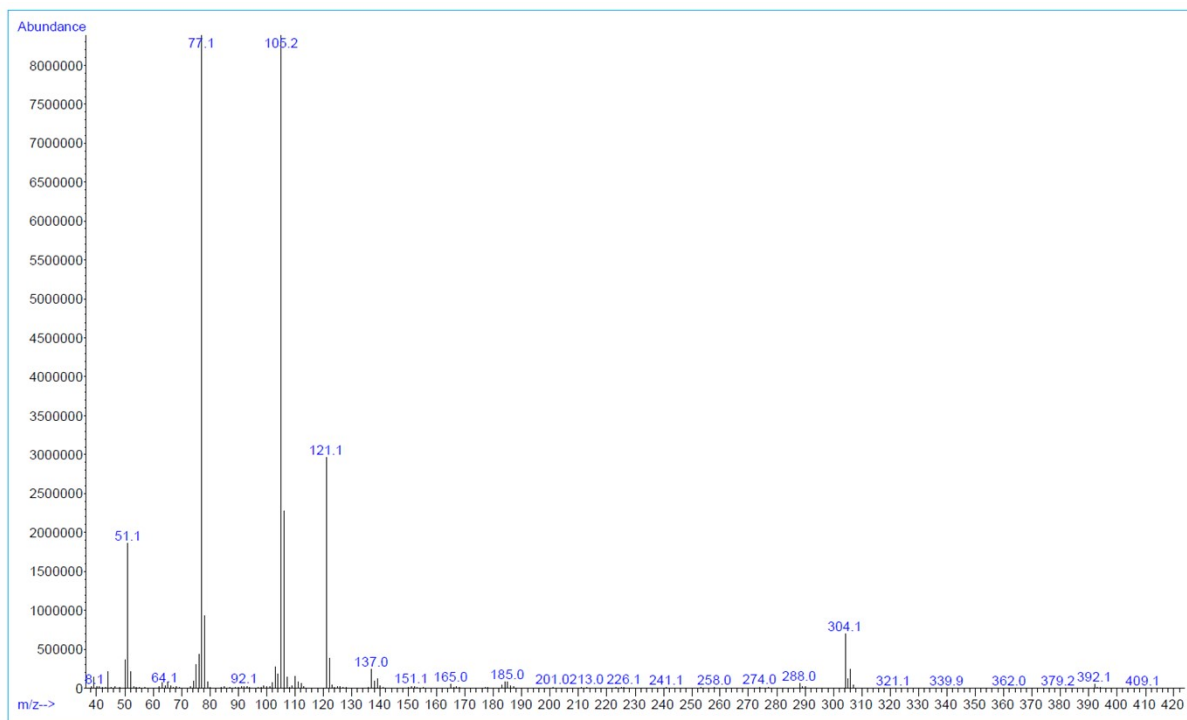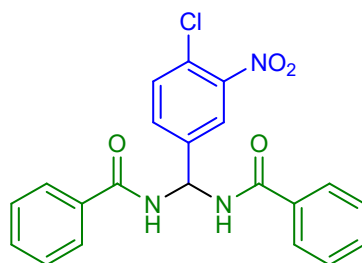

**Figure S5.** The mass spectrum of bisamide **8**.



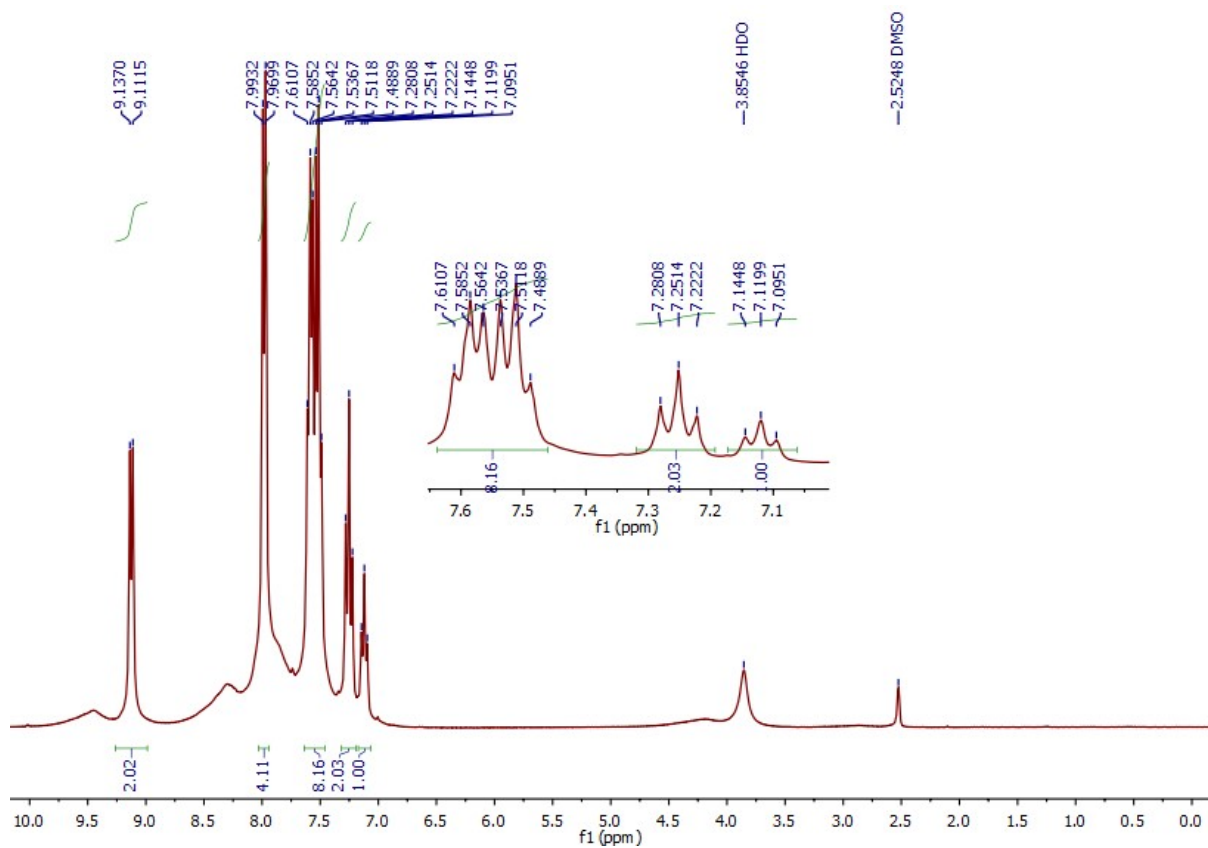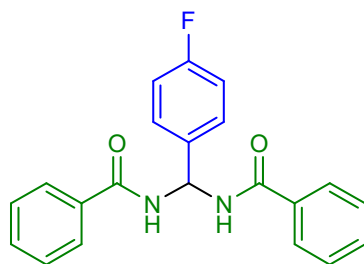

**Figure S6.** The <sup>1</sup>H NMR spectrum of bisamide **10**.

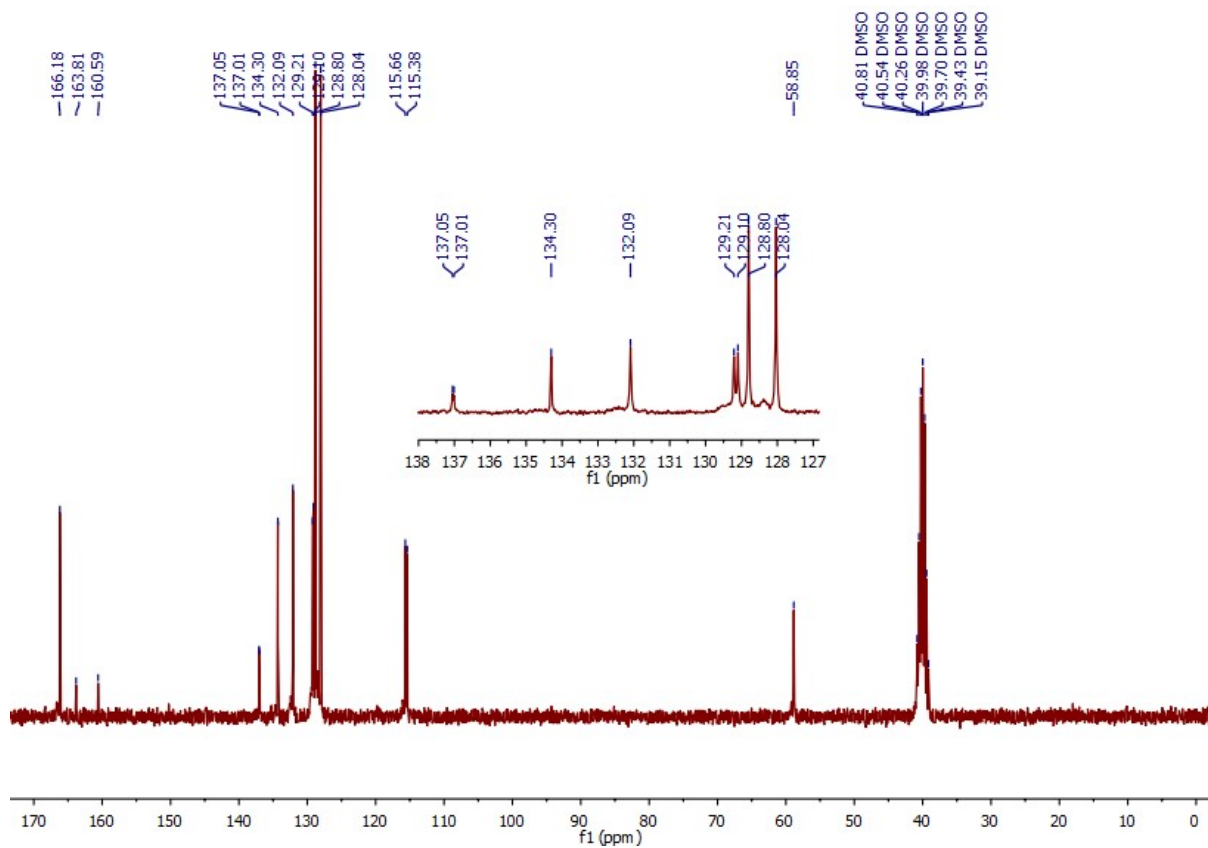

**Figure S7.** The  $^{13}\text{C}$  NMR spectrum of bisamide **10**.
